# Supplementary material
Source: publisher figshare collection journal article supplement (https://acs.figshare.com/ndownloader/files/21528012)
Supplement: Supplementary file 1 [file 21528012]

# **Supplementary Information**

## **Controlling and stabilization of Ru nanoparticles by tuning the nitrogen content of the support for enhanced H<sub>2</sub> production through aqueous phase reforming of glycerol**

Pranjal Gogoi,<sup>a,d</sup> Narsimharao Kanna,<sup>b</sup> Pakiza Begum,<sup>c</sup> Ramesh C. Deka,<sup>c</sup> Satyanarayana C. V.  
V,<sup>\*,a,b,d</sup> and Raja Thirumalaiswamy <sup>\*,a,d</sup>

<sup>a</sup> *Catalysis & Inorganic Chemistry Division, CSIR-National Chemical Laboratory, Dr. Homi  
Bhabha Road, Pune-411008, India, Tel: +91-9890626115.*

<sup>b</sup> *Hindustan Petroleum Green R & D Centre, Devangonthi, Bengaluru-560067, India.*

<sup>c</sup> *Department of Chemical sciences, Tezpur university, Tezpur-784028, Assam, India.*

<sup>d</sup> *Academy of Scientific and inovative Research (AcSIR), Gaziabad 201002, Uttar Pradesh, India*

\*E-mail:[t.raja@ncl.res.in](mailto:t.raja@ncl.res.in) (Thirumalaiswamy Raja)

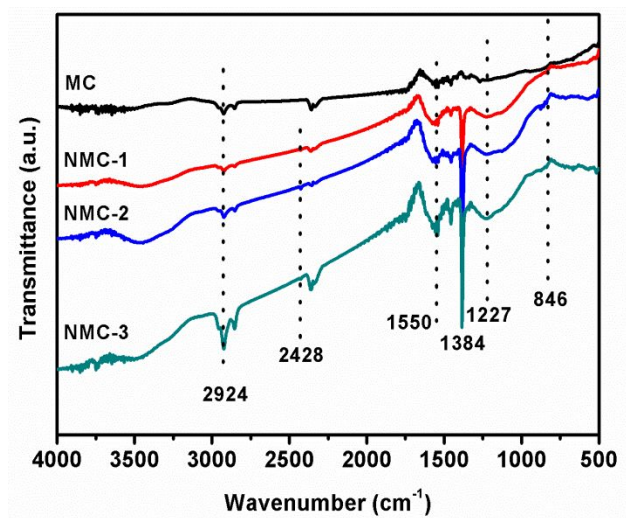

**Figure S1.** FTIR spectra of NMCs.

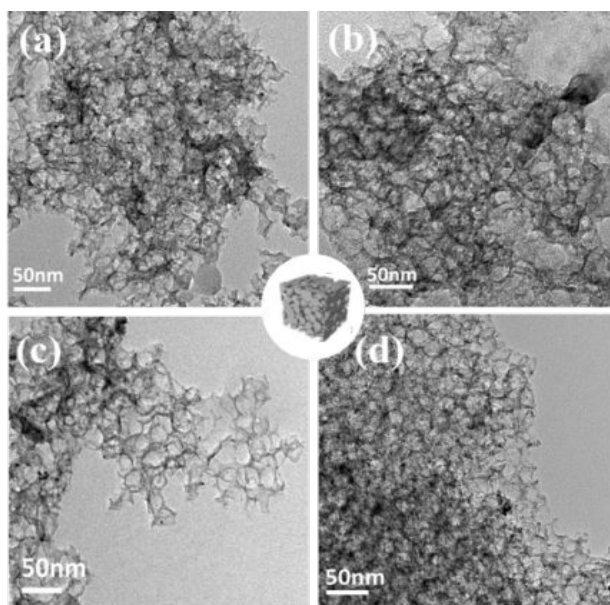

**Figure S2.** TEM images of (a) MC (b) NMC-1(c) NMC-2 (d) NMC-3.

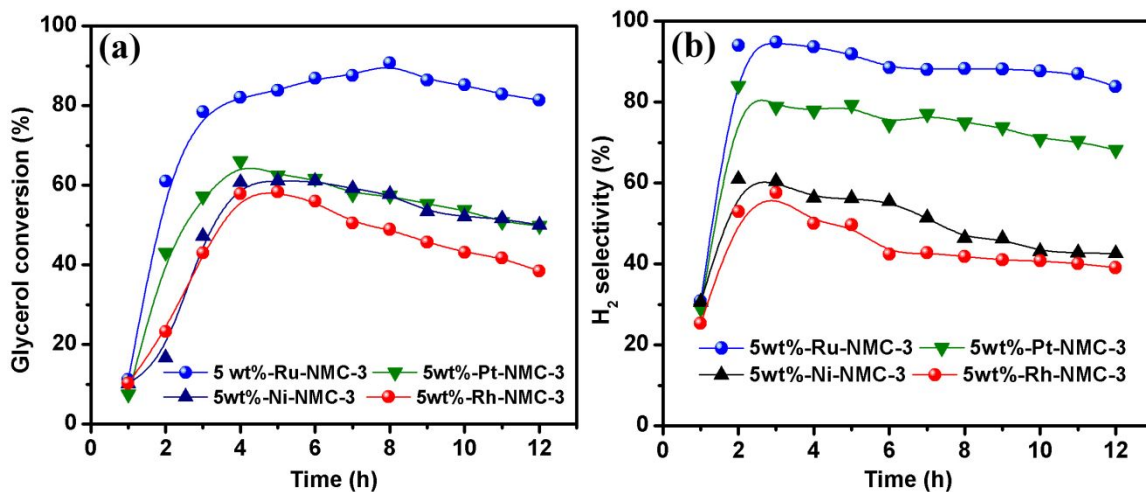

**Figure S3.** Comparison of (a) Glycerol conversion and (b) H<sub>2</sub> selectivity with time over different metal supported catalysts.

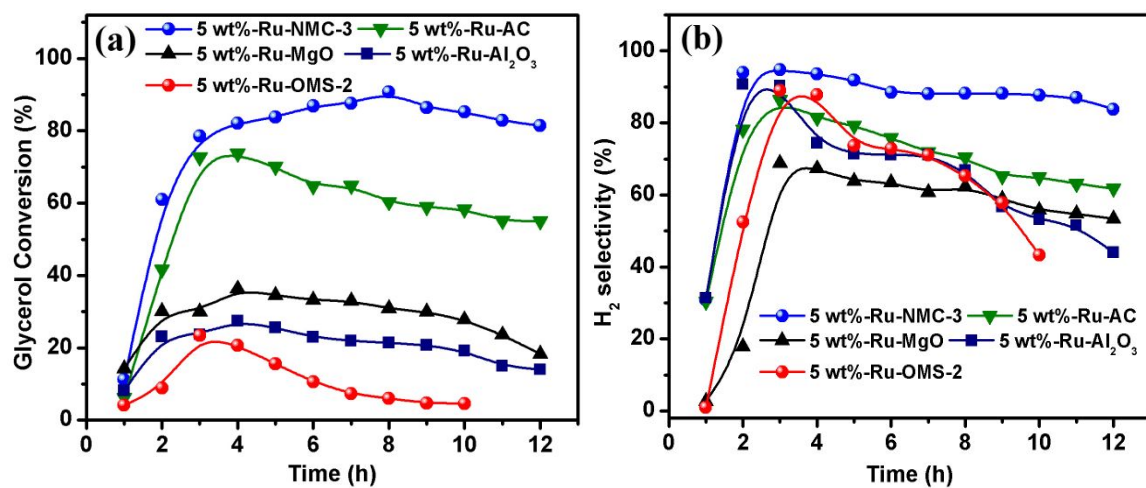

**Figure S4.** Comparison of (a) Glycerol conversion and (b) H<sub>2</sub> selectivity with time over different supported catalysts.

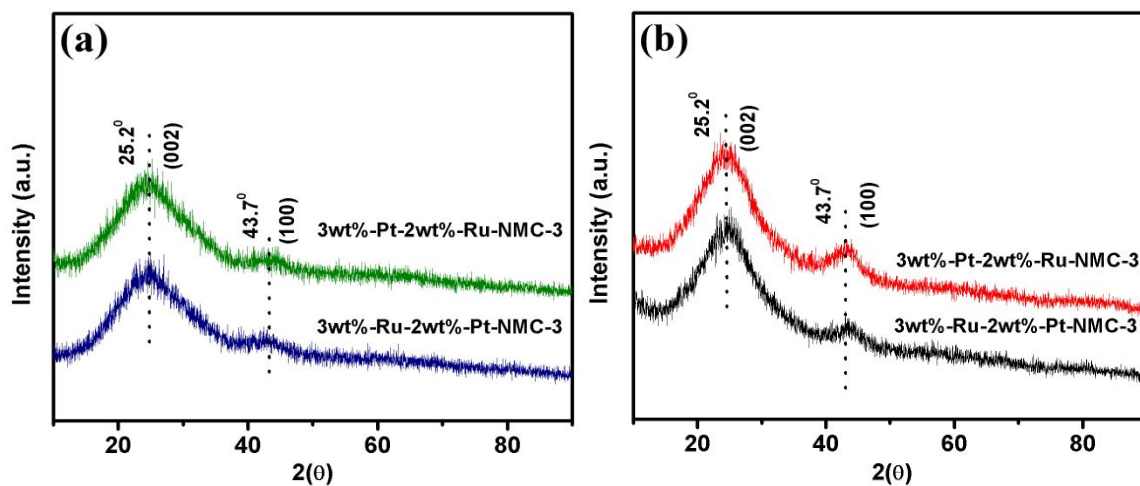

**Figure S5:** XRD pattern of (a) fresh catalysts (b) spent catalysts.

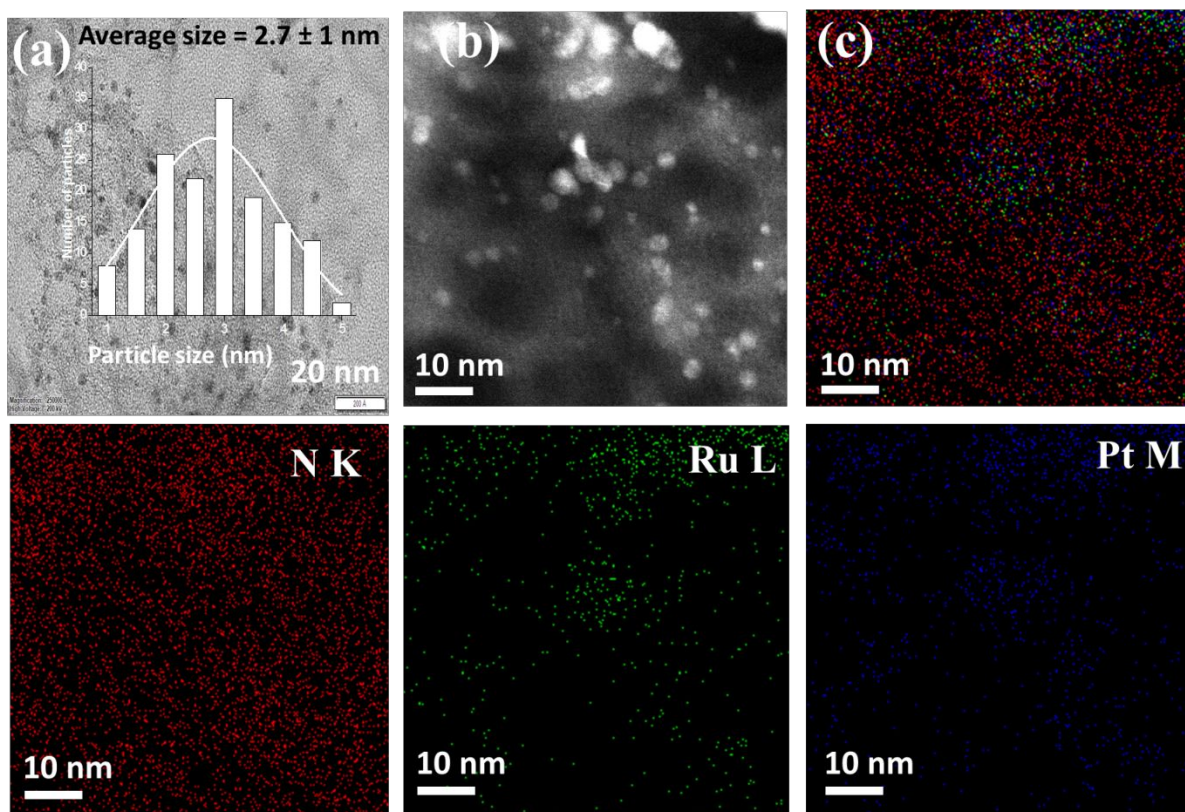

**Figure S6:**(a)HRTEM micrograph and (b)STEM HADAF image (c) elemental mapping of spent 3%Ru-2%Pt-NMC-3.

**Table.S1** Porosity, BET surface area, Ru content of the spent catalysts

| Sample                                                       | BET surface area (m <sup>2</sup> /g) <sup>[a]</sup> | Total pore volume <sup>[a]</sup> (cc/g) | Micropore volume (cc/g) | Ru Metal content (wt%) <sup>(b)</sup> |
|--------------------------------------------------------------|-----------------------------------------------------|-----------------------------------------|-------------------------|---------------------------------------|
| 5%wt Ru-MC                                                   | 560                                                 | 0.4                                     | 0.1                     | 4.7                                   |
| 5%wt Ru-NMC-1                                                | 692                                                 | 0.9                                     | 0.07                    | 4.76                                  |
| 5%wt Ru-NMC-2                                                | 791                                                 | 1.1                                     | 0.06                    | 4.8                                   |
| 5%wt Ru-NMC-3                                                | 780                                                 | 1.0                                     | 0.03                    | 4.8                                   |
| [a] Total pore volume at P/P <sub>0</sub> = 0.9, [b] ICP-OES |                                                     |                                         |                         |                                       |
